# Supplementary material for: Controlled Release of Doxorubicin for Targeted Chemo-Photothermal Therapy in Breast Cancer HS578T Cells Using Albumin Modified Hybrid Nanocarriers
Source: MDPI journal article supplement (doi:10.3390/ijms222011228), 2021-10-18
Supplement: s1 [file s1]

# Supplementary Materials: Controlled Release of Doxorubicin for Targeted Chemo-Photothermal Therapy in a Breast Cancer HS578T Cells using Albumin Modified Hybrid Nanocarriers

Barbara Carrese <sup>1,†</sup>, Chiara Cavallini <sup>2,†</sup>, Gennaro Sanità <sup>3</sup>, Paolo Armanetti <sup>2</sup>, Brigida Silvestri <sup>4</sup>, Gaetano Calì <sup>5</sup>, Giulio Pota <sup>4</sup>, Giuseppina Luciani <sup>4</sup>, Luca Menichetti <sup>2,\*</sup> and Annalisa Lamberti <sup>1,\*</sup>

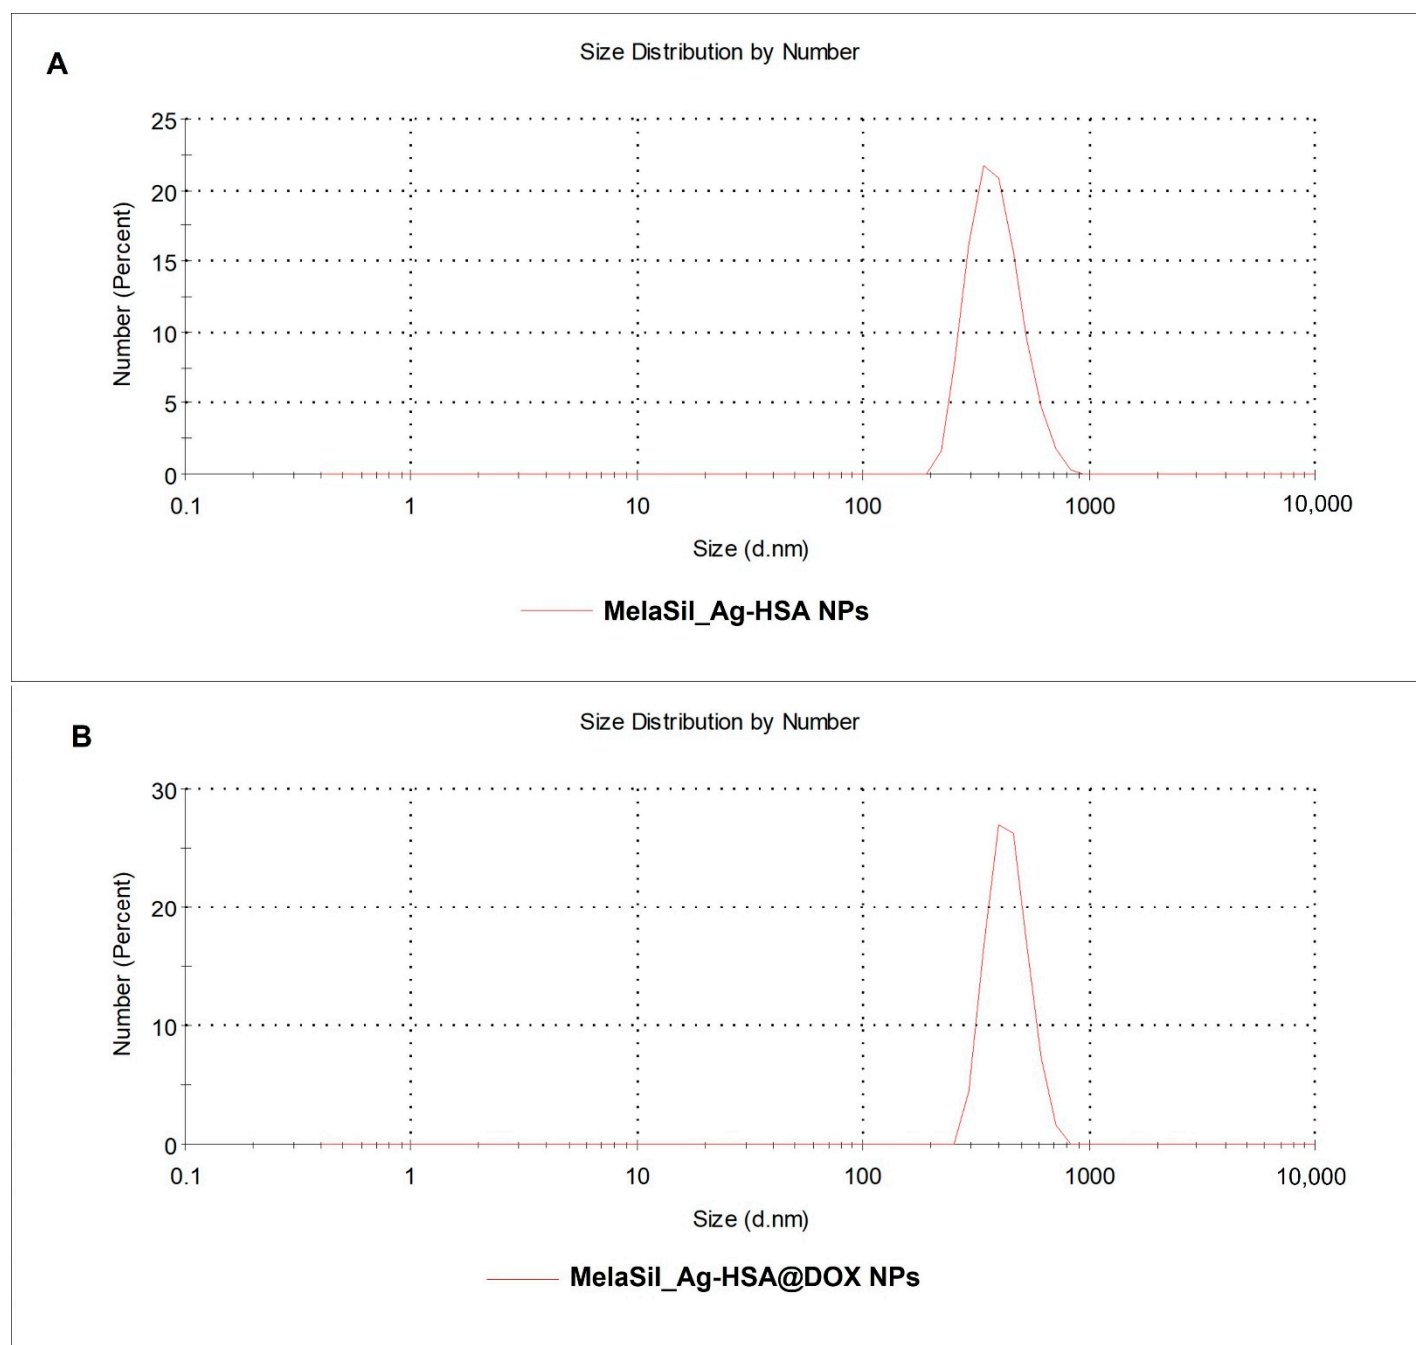

**Figure S1.** Number distribution (%) of DLS measurements on (A) MelaSil\_Ag-HSA NPs at 10, 0  $\mu\text{g/mL}$  and (B) MelaSil\_Ag-HSA@DOX NPs at 100  $\mu\text{g/mL}$ .

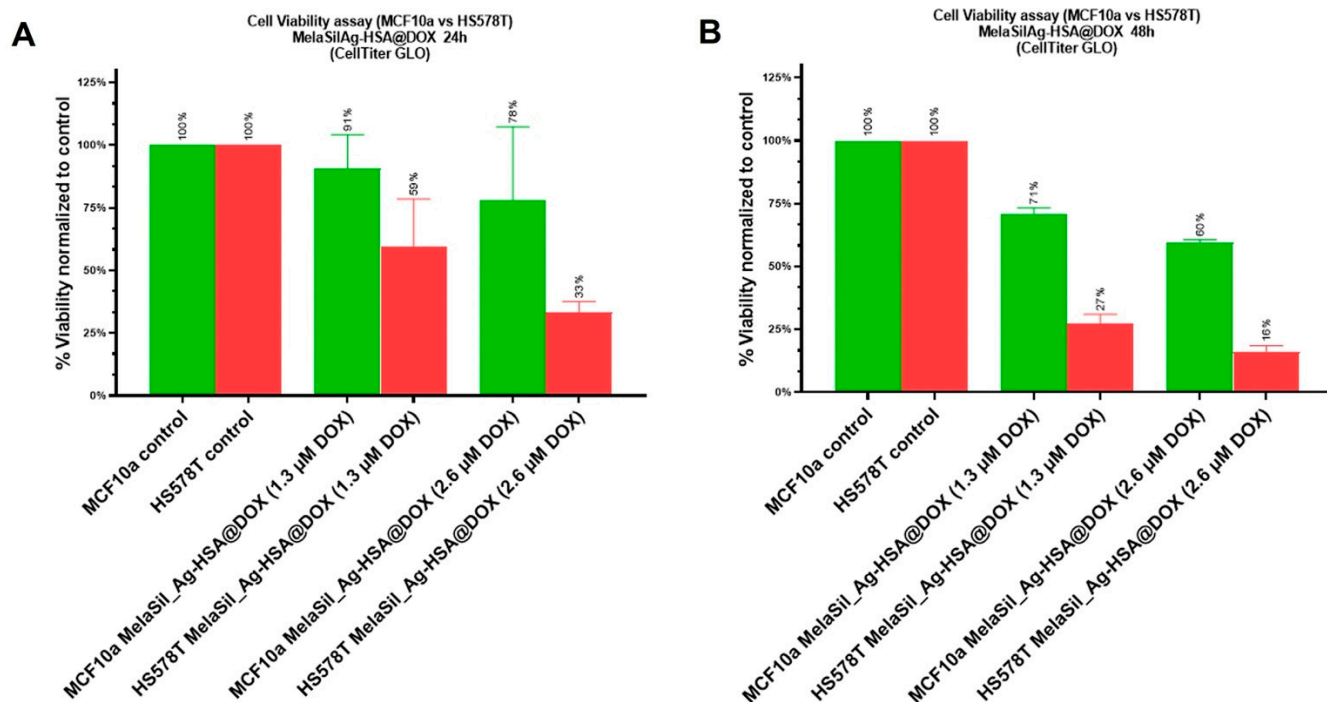

**Figure S2.** Cell viability assay. Cell-Titer GLO assay of HS578T and MCF10a cells treated for 24 h (A) and 48 h (B) with MelaSil\_Ag-HSA@DOX NPs.  $P < 0.05$

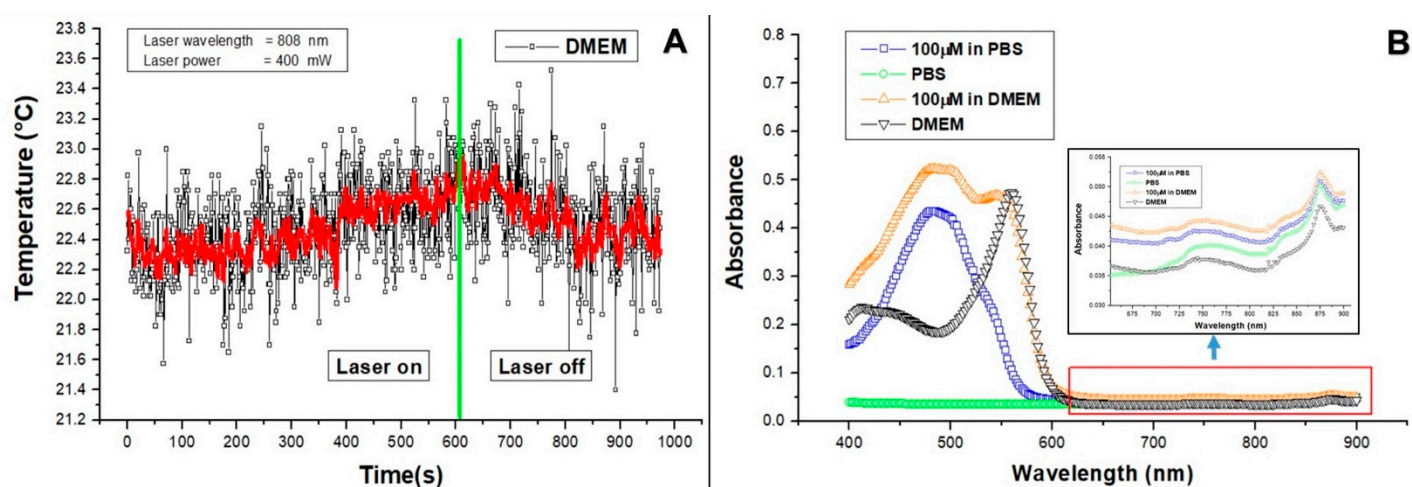

**Figure S3. (A)** Thermal trend of DMEM culture medium as a function of 808 nm laser irradiation (400 mW) time. CW heating (laser on) and cooling (laser off) processes. **(B)** Spectrophotometric analysis of the light absorbance properties of free DOX (100  $\mu$ M) in DMEM (orange), free DOX (100  $\mu$ M) in PBS (blue), DMEM (black), and PBS (green)
